# Supplementary material for: Root colonisation and induction of plant defence-associated signalling pathways in Arabidopsis thaliana by Serratia marcescens, Streptomyces galilaeus, and Trichoderma viride
Source: Research Square preprint supplement (doi:10.21203/rs.3.rs-7125135/v1), 2025-07-18
Supplement: Supplementary file 1 [file cd3b7e2b144e39f021c4c2ed.docx]

**Root colonisation and induction of plant defence-associated signalling pathways in *Arabidopsis thaliana* by *Serratia marcescens*, *Streptomyces galilaeus*, and *Trichoderma viride***

Archives of Microbiology

Luis Enrique Luna-Hernández1, Graciela Huerta-Palacios1, Francisco Holguín-Meléndez2, Karina Guillén-Navarro1*

1 *Grupo Académico de Biotecnología Ambiental*. *El Colegio de la Frontera Sur* (ECOSUR), *Unidad Tapachula*, Carretera Antiguo Aeropuerto Km 2.5, 30700, Tapachula, Chiapas, Mexico.

2 *Laboratorio de Diagnóstico Fitosanitario, El Colegio de la Frontera Sur (ECOSUR), Unidad Tapachula*, Carretera Antiguo Aeropuerto Km 2.5, 30700, Tapachula, Chiapas, Mexico.

*Corresponding author: kguillen@ecosur.mx

Supplementary Information

**Supplementary Table 1**: Sequences of the primers used in the gene expression assay

| Gene | sequence fw primer (5’-3’) | sequence rev primer (5’-3’) | Amplicon size (bp) | Source |
| --- | --- | --- | --- | --- |
| *PR1* | CTCGGAGCTACGCAGAACAA | TTCTCGCTAACCCACATGTTCA | 133 | (Yang et al., 2023) |
| *PDF1.2* | AGTTGTGCGAGAAGCCAAGT | GTTGCATGATCCATGTTTGG | 107 |
| *UBQ10* | AAAGAGATAACAGGAACGGAAACA TAGT | GGCCTTGTATAATCCCTGATGAATA AG | 61 |
| *EF1α* | TGAGCACGCTCTTCTTGCTTTCA | GGTGGTGGCATCCATCTTGTTACA | 76 | (Mathys et al., 2012) |


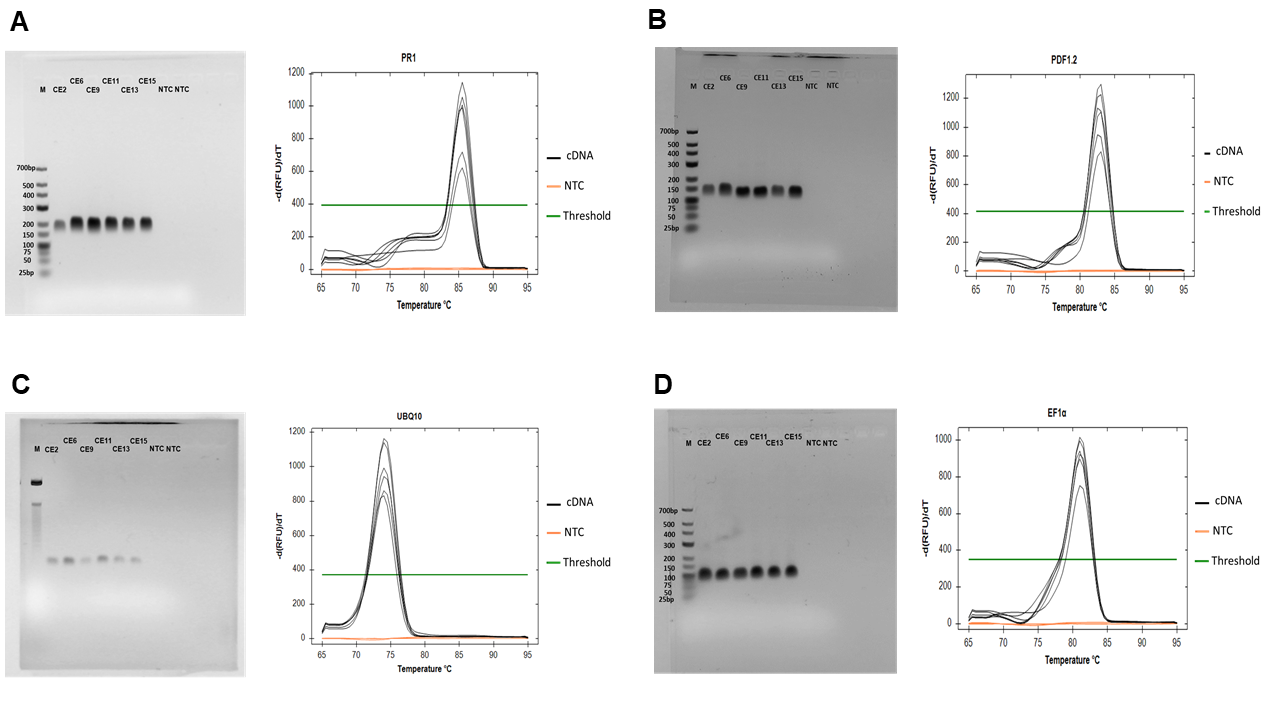


**Supplementary Figure 1**: Validation of primers PR1 (A), PDF1.2 (B), UBQ10 (C), and EF1α (D). Left panel of each section: images of electrophoresis gels (2% agarose) of RT-qPCR amplicons. Right panel: RT-qPCR melting curve, with corresponding no template control76 (NTC) and threshold. In all cases a single amplicon is observed.

**
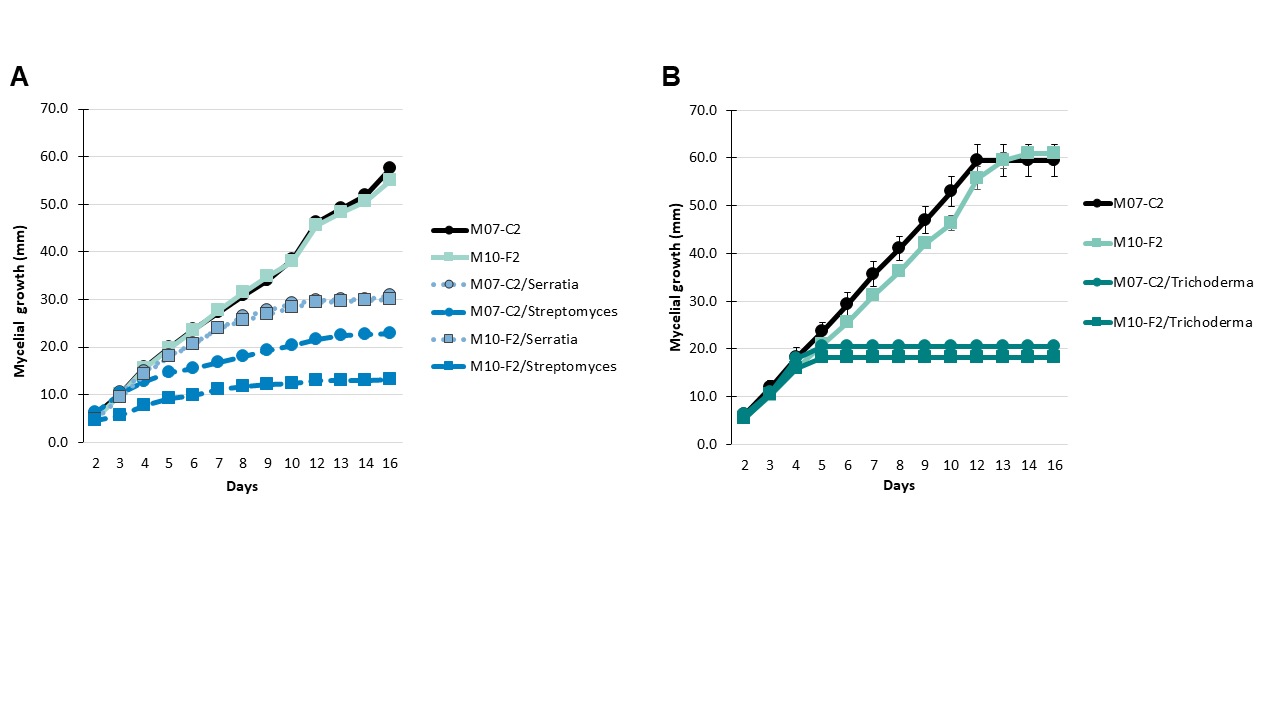
**

**Supplementary Figure 2**: Mycelial growth of *Colletotrichum* strains M07-C2 and M10-F2 in interaction with antagonistic microorganisms: (A) *Serratia marcescens* CFFSUR-B2 and *Streptomyces galilaeus* CFFSUR-B12; (B) *Trichoderma viride* CFFSUR-A21. Presented values are the means of seven replicates ± sd.
